# Supplementary material for: SIRT6-specific inhibitor OSS-128167 exacerbates diabetic cardiomyopathy by aggravating inflammation and oxidative stress
Source: PubMed Central journal article supplement — Mol Med Rep. 2021 Mar 16;23(5):367. doi: 10.3892/mmr.2021.12006 (PMC7986000; doi:10.3892/mmr.2021.12006), 2021-03-16
Supplement: Supplementary_Data.pdf [file Supplementary_Data.pdf]

Figure S1. Effects of OSS-128167 treatment on insulin levels, blood glucose and HW/BW of STZ-induced diabetic mice. (A) Flow chart showing generation of the type 1 diabetic mouse model, drug intervention and fasting blood glucose monitoring. Effects of OSS-128167 treatment on (B) blood glucose, (C) insulin levels and (D) HW/BW of STZ-induced diabetic mice. n=6-9 per group. \*\*P<0.01, \*\*\*P<0.001 vs. Vehicle; blue NS represents P≥0.05, OSS-20 (mg/kg) vs. STZ-DM1; purple NS represents P≥0.05, OSS-50 (mg/kg) vs. STZ-DM1. STZ, streptozotocin; STZ-DM1, STZ-induced diabetes; HW/BW, heart weight/body weight.

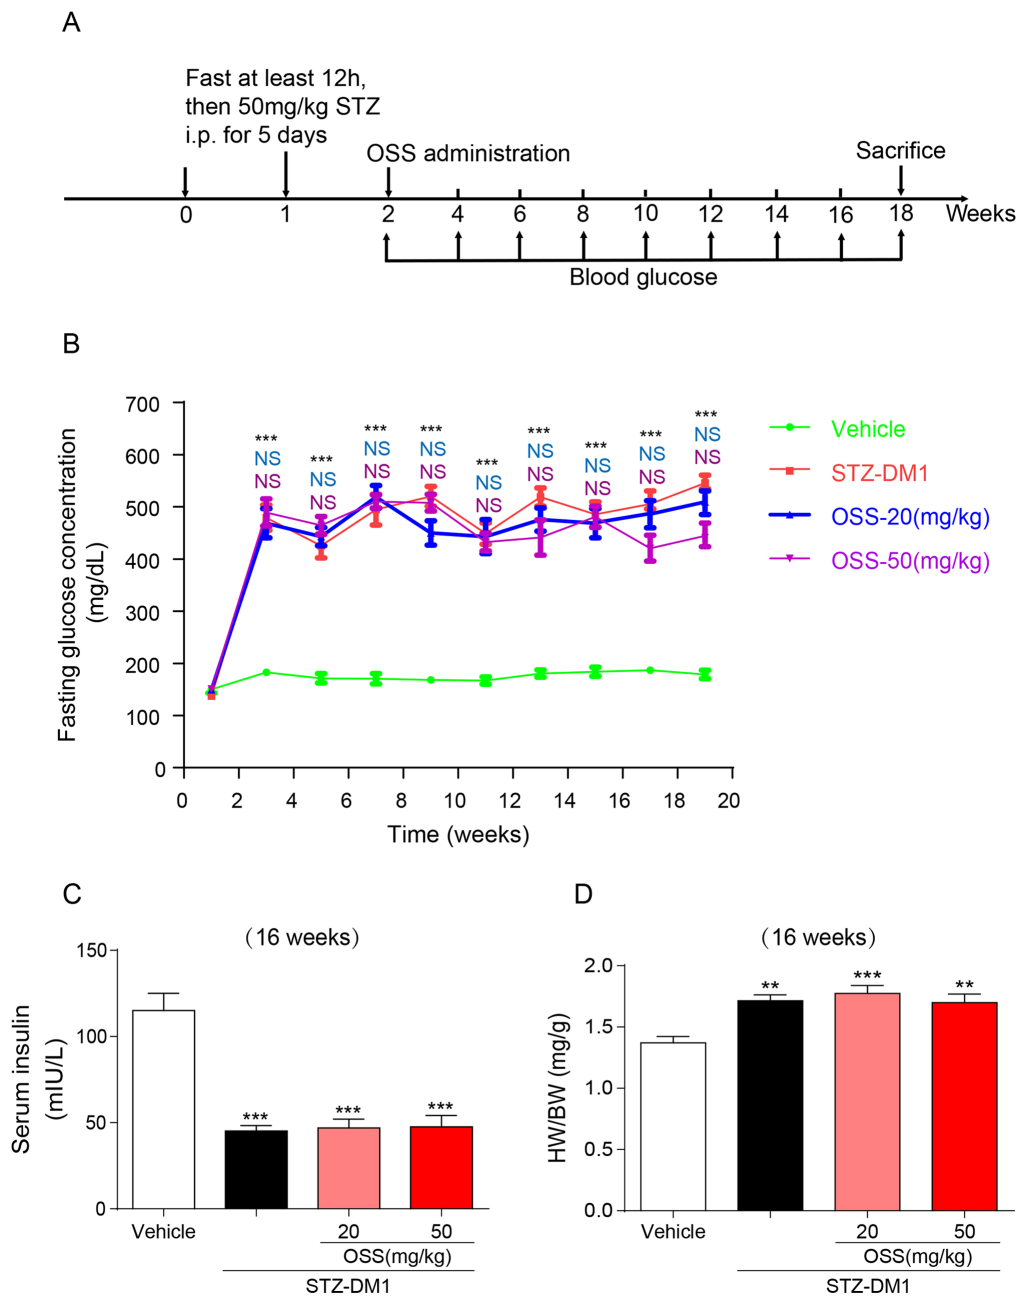

Table SI. Primer sequences for reverse transcription-quantitative PCR.

| Primer         | Species | Sense (5'-3')          | Antisense (5'-3')      |
|----------------|---------|------------------------|------------------------|
| TNF- $\alpha$  | Mouse   | TGATCCGCGACGTGGAA      | ACCGCCTGGAGTTCTGGAA    |
| COL-1          | Rat     | TGGCCTTGGAGGAACTTTG    | CTTGGAACCTTGTGGACCAG   |
| CTGF           | Rat     | ACTATGATGCGAGCCAACCTGC | TGTCCGGATGCACTTTTTGC   |
| TGF- $\beta$   | Rat     | GTTCTATGCGACTTGCCCCT   | AATGTGGTGCAGCCCATGTA   |
| TNF- $\alpha$  | Rat     | TACTCCAGGTTCTCTCAAGG   | GGAGGCTGACTTTCTCCTGGTA |
| $\beta$ -actin | Mouse   | CCGTGAAAAGATGACCCAGA   | TACGACCAGAGGCATACAG    |
| $\beta$ -actin | Rat     | AAGTCCCTCACCTCCAAAAG   | AAGCAATGCTGTCACCTTCCC  |

TNF- $\alpha$ , tumor necrosis factor- $\alpha$ ; COL1, collagen 1; CTGF, connective tissue growth factor; TGF- $\beta$ , transforming growth factor  $\beta$ .
